# Supplementary material for: SORL1 Polymorphisms in Mexican Patients with Alzheimer’s Disease
Source: MDPI journal article supplement (doi:10.3390/genes13040587), 2022-03-25
Supplement: s1 [file s1]

**Table S1.** Single Nucleotide Polymorphisms (SNPs) used in this study. SNPs are referred in this paper according to Rogaeva *et al*\*.

| Marker Number* | dbSNP      | Physical Map |               |           | Minor Allele (Frequency) |                           |
|----------------|------------|--------------|---------------|-----------|--------------------------|---------------------------|
|                | rs Number  | Alleles      | Location (bp) | SNP Type  | White Subjects           | African American Subjects |
| 4              | rs661057   | C/T          | 120834164     | Intrón 1  | C (0.42)                 | C (0.29)                  |
| 8              | rs668387   | T/C          | 120873131     | Intrón 6  | T (0.41)                 | T (0.36)                  |
| 9              | rs689021   | G/A          | 120876330     | Intrón 6  | A (0.42)                 | A (0.35)                  |
| 10             | rs641120   | C/T          | 120886175     | Intrón    | T (0.41)                 | T (0.33)                  |
| 12             | rs12285364 | C/T          | 120898436     | Intrón 9  | T (0.05)                 | T (0.09)                  |
| 19             | rs2070045  | G/T          | 120953300     | Exón 25   | G (0.23)                 | G (0.08)                  |
| 20             | rs3824966  | C/G          | 120953393     | Intrón    | G (0.23)                 | G (0.08)                  |
| 22             | rs1699102  | C/T          | 120962172     | N1246N    | C (0.33)                 | T (0.47)                  |
| 23             | rs3824968  | A/T          | 120981132     | A1584A    | A (0.31)                 | A (0.13)                  |
| 24             | rs2282649  | C/T          | 120984168     | Intrón 38 | T (0.28)                 | T (0.11)                  |
| 25             | rs1010159  | A/G          | 120988611     | Intrón 39 | C (0.37)                 | T (0.46)                  |
| 26             | rs1784933  | A/G          | 120994626     | Intrón    | G (0.06)                 | G (0.39)                  |

Figure S1

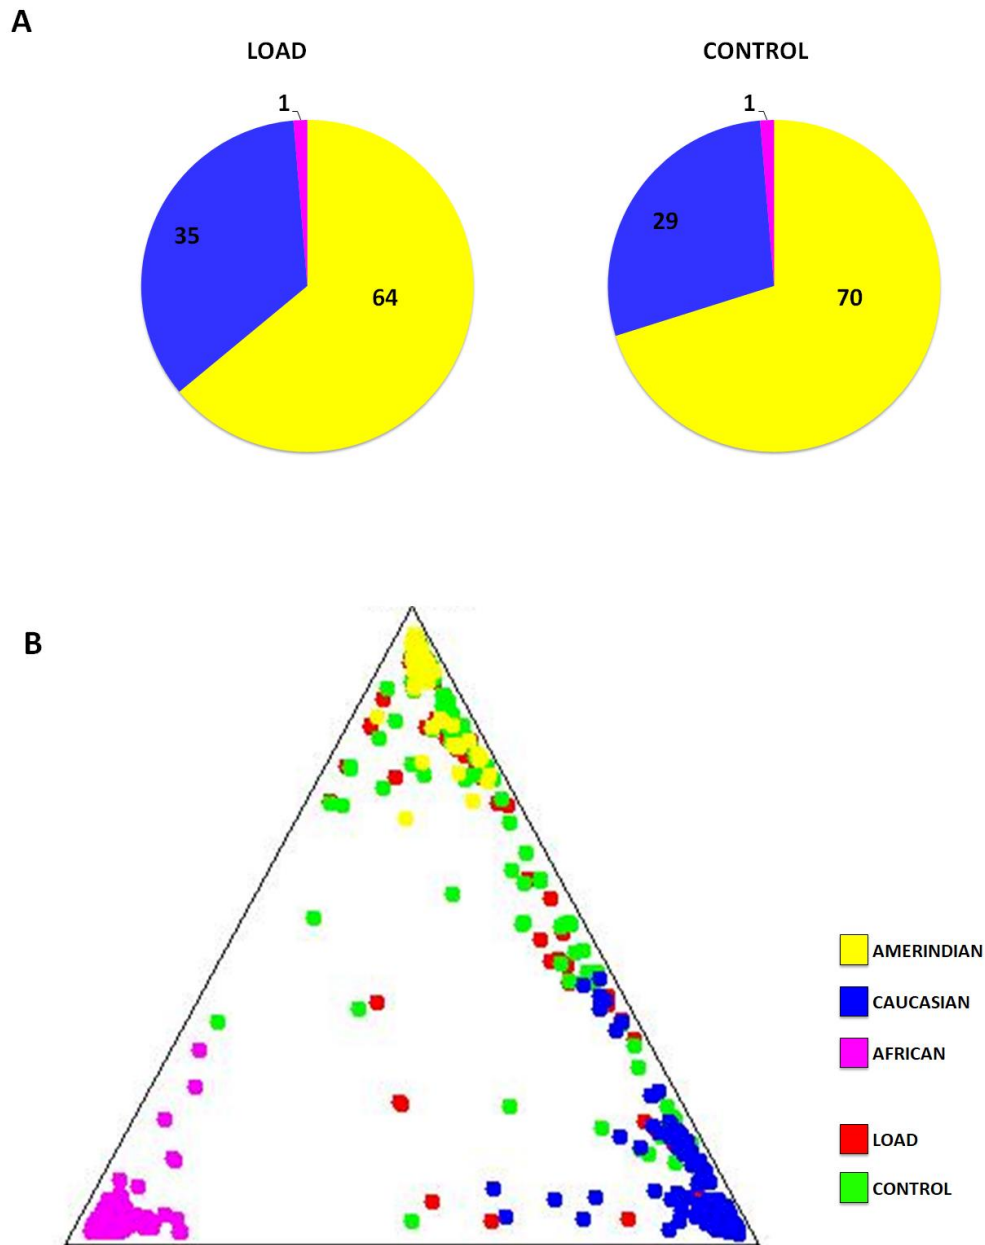

**Figure S1. Cluster analysis and ancestry.**

**(A)** The proportions of ancestry in each group of study were estimated in the LEADMIX software (Wang, 2003) taking the ancestral populations. No significant differences were found, the chi-square statistic is 0.8312. The  $p$ -value is 0.66. The result is *not* significant at  $p < 0.05$ . **(B)** The triangle obtained from the STRUCTURE software (Pritchard et al., 2000) allows to observe that the distribution of the individuals of each study group between the three ancestral clusters is similar.

Table S2. Genotypic distribution in different populations

|           |    | *CAUCASIAN <sup>13,41</sup> |       | **ASIAN <sup>34,52-54</sup> |       | ***AFRICAN DESCENT <sup>41</sup> |       | ****HISPANIC <sup>41</sup> |       | MEXICAN |       |
|-----------|----|-----------------------------|-------|-----------------------------|-------|----------------------------------|-------|----------------------------|-------|---------|-------|
| GENOTYPE  |    | CONTROL                     | LOAD  | CONTROL                     | LOAD  | CONTROL                          | LOAD  | CONTROL                    | LOAD  | CONTROL | LOAD  |
| rs668387  | CC | 0.28                        | 0.34  | 0.257                       | 0.218 | 0.468                            | 0.398 | 0.366                      | 0.382 | 0.308   | 0.301 |
|           | CT | 0.55                        | 0.47  | 0.461                       | 0.503 | 0.43                             | 0.466 | 0.479                      | 0.472 | 0.516   | 0.545 |
|           | TT | 0.17                        | 0.18  | 0.282                       | 0.278 | 0.101                            | 0.138 | 0.155                      | 0.146 | 0.176   | 0.154 |
| rs689021  | GG | 0.28                        | 0.34  | 0.302                       | 0.304 | 0.456                            | 0.375 | 0.325                      | 0.365 | 0.299   | 0.308 |
|           | GA | 0.55                        | 0.47  | 0.461                       | 0.492 | 0.437                            | 0.477 | 0.49                       | 0.478 | 0.525   | 0.545 |
|           | AA | 0.17                        | 0.19  | 0.237                       | 0.204 | 0.108                            | 0.148 | 0.186                      | 0.157 | 0.176   | 0.147 |
| rs641120  | GG | 0.28                        | 0.34  | 0.302                       | 0.272 | 0.551                            | 0.472 | 0.387                      | 0.421 | 0.308   | 0.314 |
|           | GA | 0.55                        | 0.46  | 0.574                       | 0.528 | 0.38                             | 0.427 | 0.469                      | 0.455 | 0.52    | 0.538 |
|           | AA | 0.17                        | 0.19  | 0.12                        | 0.20  | 0.07                             | 0.101 | 0.144                      | 0.124 | 0.172   | 0.147 |
| rs2070045 | GG | 0.05                        | 0.047 | 0.26                        | 0.182 | 0.019                            | 0.011 | 0.057                      | 0.056 | 0.308   | 0.269 |
|           | GT | 0.391                       | 0.375 | 0.60                        | 0.519 | 0.228                            | 0.18  | 0.361                      | 0.354 | 0.466   | 0.487 |
|           | TT | 0.559                       | 0.578 | 0.14                        | 0.299 | 0.753                            | 0.809 | 0.582                      | 0.59  | 0.226   | 0.244 |
| rs3824966 | GG | 0 (-)                       | 0 (-) | 0.613                       | 0.565 | 0 (-)                            | 0 (-) | 0 (-)                      | 0 (-) | 0.294   | 0.269 |
|           | GC | 0 (-)                       | 0 (-) | 0.336                       | 0.363 | 0 (-)                            | 0 (-) | 0 (-)                      | 0 (-) | 0.462   | 0.474 |
|           | CC | 0 (-)                       | 0 (-) | 0.051                       | 0.072 | 0 (-)                            | 0 (-) | 0 (-)                      | 0 (-) | 0.244   | 0.256 |
| rs1699102 | CC | 0.113                       | 0.102 | 0.615                       | 0.561 | 0.234                            | 0.216 | 0.227                      | 0.219 | 0.466   | 0.397 |
|           | CT | 0.481                       | 0.463 | 0.346                       | 0.356 | 0.50                             | 0.5   | 0.5                        | 0.5   | 0.416   | 0.436 |
|           | TT | 0.406                       | 0.435 | 0.038                       | 0.083 | 0.266                            | 0.284 | 0.273                      | 0.281 | 0.118   | 0.167 |
| rs3824968 | TT | 0.065                       | 0.097 | 0.15                        | 0.08  | 0.025                            | 0.023 | 0.093                      | 0.079 | 0.213   | 0.244 |
|           | TA | 0.387                       | 0.437 | 0.47                        | 0.44  | 0.259                            | 0.239 | 0.423                      | 0.404 | 0.493   | 0.493 |
|           | AA | 0.548                       | 0.466 | 0.38                        | 0.49  | 0.715                            | 0.739 | 0.485                      | 0.517 | 0.294   | 0.263 |
| rs2282649 | TT | 0.043                       | 0.088 | 0.195                       | 0.229 | 0.025                            | 0.011 | 0.077                      | 0.079 | 0.294   | 0.25  |
|           | TC | 0.333                       | 0.422 | 0.501                       | 0.558 | 0.278                            | 0.193 | 0.402                      | 0.404 | 0.471   | 0.487 |
|           | CC | 0.624                       | 0.49  | 0.304                       | 0.213 | 0.696                            | 0.795 | 0.521                      | 0.517 | 0.235   | 0.263 |
| rs1010159 | CC | 0.14                        | 0.117 | 0.202                       | 0.227 | 0.31                             | 0.352 | 0.211                      | 0.23  | 0.321   | 0.276 |
|           | CT | 0.473                       | 0.447 | 0.496                       | 0.558 | 0.494                            | 0.477 | 0.495                      | 0.5   | 0.452   | 0.314 |
|           | TT | 0.387                       | 0.437 | 0.302                       | 0.215 | 0.196                            | 0.17  | 0.294                      | 0.27  | 0.226   | 0.41  |
| rs1784933 | GG | 0.013                       | 0.034 | 0.64                        | 0.461 | 0.019                            | 0.11  | 0.026                      | 0.034 | 0.226   | 0.154 |
|           | GA | 0.158                       | 0.292 | 0.32                        | 0.423 | 0.228                            | 0.18  | 0.273                      | 0.292 | 0.452   | 0.41  |
|           | AA | 0.829                       | 0.874 | 0.04                        | 0.116 | 0.753                            | 0.809 | 0.701                      | 0.674 | 0.321   | 0.436 |

\*Mixed populations

**Table S3. Allelic Distributions in different populations**

|           | ALLELE | *CAUCASIAN <sup>13,41</sup> |       | **ASIAN <sup>34,52-54</sup> |       | ***AFRICAN DESCENT <sup>41</sup> |       | ****HISPANIC <sup>41</sup> |       | MEXICAN |      |
|-----------|--------|-----------------------------|-------|-----------------------------|-------|----------------------------------|-------|----------------------------|-------|---------|------|
|           |        | CONTROL                     | LOAD  | CONTROL                     | LOAD  | CONTROL                          | LOAD  | CONTROL                    | LOAD  | CONTROL | LOAD |
| rs668387  | C      | 0.55                        | 0.58  | 0.49                        | 0.47  | 0.68                             | 0.63  | 0.61                       | 0.62  | 0.57    | 0.57 |
|           | T      | 0.45                        | 0.42  | 0.51                        | 0.53  | 0.32                             | 0.37  | 0.39                       | 0.38  | 0.43    | 0.43 |
| rs689021  | G      | 0.55                        | 0.57  | 0.53                        | 0.55  | 0.67                             | 0.61  | 0.57                       | 0.6   | 0.56    | 0.58 |
|           | A      | 0.45                        | 0.432 | 0.47                        | 0.45  | 0.33                             | 0.39  | 0.43                       | 0.4   | 0.44    | 0.42 |
| rs641120  | G      | 0.55                        | 0.58  | 0.59                        | 0.54  | 0.74                             | 0.69  | 0.62                       | 0.65  | 0.57    | 0.58 |
|           | A      | 0.45                        | 0.42  | 0.41                        | 0.46  | 0.26                             | 0.31  | 0.38                       | 0.35  | 0.43    | 0.42 |
| rs2070045 | G      | 0.24                        | 0.23  | 0.56                        | 0.44  | 0.13                             | 0.1   | 0.24                       | 0.23  | 0.54    | 0.51 |
|           | T      | 0.76                        | 0.77  | 0.44                        | 0.56  | 0.87                             | 0.9   | 0.76                       | 0.77  | 0.46    | 0.49 |
| rs3824966 | G      | 0 (-)                       | 0 (-) | 0.781                       | 0.747 | 0 (-)                            | 0 (-) | 0 (-)                      | 0 (-) | 0.47    | 0.49 |
|           | C      | 0 (-)                       | 0 (-) | 0.219                       | 0.253 | 0 (-)                            | 0 (-) | 0 (-)                      | 0 (-) | 0.53    | 0.51 |
| rs1699102 | C      | 0.33                        | 0.35  | 0.79                        | 0.74  | 0.48                             | 0.47  | 0.48                       | 0.47  | 0.67    | 0.61 |
|           | T      | 0.67                        | 0.65  | 0.21                        | 0.26  | 0.52                             | 0.53  | 0.52                       | 0.53  | 0.33    | 0.39 |
| rs3824968 | T      | 0.26                        | 0.4   | 0.41                        | 0.31  | 0.16                             | 0.14  | 0.3                        | 0.28  | 0.46    | 0.49 |
|           | A      | 0.74                        | 0.6   | 0.59                        | 0.69  | 0.84                             | 0.86  | 0.7                        | 0.72  | 0.54    | 0.51 |
| rs2282649 | T      | 0.2                         | 0.32  | 0.45                        | 0.51  | 0.16                             | 0.11  | 0.28                       | 0.28  | 0.53    | 0.49 |
|           | C      | 0.8                         | 0.68  | 0.55                        | 0.49  | 0.84                             | 0.89  | 0.72                       | 0.72  | 0.47    | 0.51 |
| rs1010159 | C      | 0.38                        | 0.42  | 0.45                        | 0.51  | 0.56                             | 0.59  | 0.46                       | 0.48  | 0.55    | 0.48 |
|           | T      | 0.62                        | 0.58  | 0.55                        | 0.49  | 0.44                             | 0.41  | 0.54                       | 0.52  | 0.45    | 0.52 |
| rs1784933 | G      | 0.09                        | 0.07  | 0.8                         | 0.672 | 0.37                             | 0.26  | 0.16                       | 0.18  | 0.45    | 0.36 |
|           | A      | 0.91                        | 0.93  | 0.2                         | 0.328 | 0.63                             | 0.74  | 0.84                       | 0.82  | 0.55    | 0.64 |

\*Mixed populations

**Table S4. Haplotype analysis**

| rs668387                                    | rs689021 | rs641120 | rs2070045 | rs3824966 | rs1699102 | rs3824968 | rs2282649 | rs1010159 | rs1784933 | Freq   | OR (95% CI)         | P-value |
|---------------------------------------------|----------|----------|-----------|-----------|-----------|-----------|-----------|-----------|-----------|--------|---------------------|---------|
| C                                           | G        | C        | G         | G         | C         | A         | T         | G         | G         | 0.1528 | 1                   | ---     |
| T                                           | A        | T        | G         | G         | C         | A         | T         | G         | A         | 0.1388 | 0.78 (0.39 - 1.59)  | 0.5     |
| C                                           | G        | C        | T         | C         | T         | T         | C         | A         | A         | 0.1068 | 1.26 (0.62 - 2.56)  | 0.52    |
| T                                           | A        | T        | T         | C         | T         | T         | C         | A         | A         | 0.0967 | 0.37 (0.17 - 0.81)  | 0.014   |
| C                                           | G        | C        | G         | G         | C         | A         | T         | G         | A         | 0.0737 | 1.00 (0.47 - 2.13)  | 0.99    |
| C                                           | G        | C        | T         | C         | T         | T         | C         | A         | G         | 0.0716 | 0.88 (0.37 - 2.09)  | 0.77    |
| T                                           | A        | T        | G         | G         | C         | A         | T         | G         | G         | 0.059  | 4.92 (1.40-17.28)   | 0.013   |
| C                                           | G        | C        | T         | C         | C         | T         | C         | A         | G         | 0.0321 | 0.87 (0.26 - 2.89)  | 0.82    |
| C                                           | G        | C        | T         | C         | C         | T         | C         | A         | A         | 0.0296 | 0.80 (0.24 - 2.62)  | 0.71    |
| T                                           | A        | T        | T         | C         | C         | T         | C         | A         | A         | 0.023  | 4.61 (0.54 - 39.28) | 0.16    |
| T                                           | A        | T        | G         | G         | C         | A         | T         | A         | A         | 0.0168 | 0.75 (0.24 - 2.29)  | 0.61    |
| T                                           | A        | T        | T         | C         | T         | T         | C         | G         | A         | 0.0125 | 1.23 (0.22 - 6.91)  | 0.82    |
| *                                           | *        | *        | *         | *         | *         | *         | *         | *         | *         | 0.1865 | 1.02 (0.57 - 1.85)  | 0.94    |
| Global haplotype association p-value: 0.053 |          |          |           |           |           |           |           |           |           |        |                     |         |

**Table S5.** Three-loci haplotype frequency in AD and controls. No association with the presence of (8-9-10), (19-22-23) and (22-23-24) haplotypes in Mexican patients.

| Marker No.a | HAPLOTYPE | HAPLOTYPE FREQUENCY |          | OR (95% CI)      | Haplotype P-value |
|-------------|-----------|---------------------|----------|------------------|-------------------|
|             |           | AD                  | Controls |                  |                   |
| 8-9-10      | C G C     | 0.5574              | 0.5496   | 1                | -                 |
|             | T A T     | 0.4004              | 0.4184   | 1.06 (0.77-1.46) | 0.71              |
|             | T A C     | 0.0097              | 0.0137   | 1.33 (0.37-4.77) | 0.66              |
|             | C G T     | 0.0065              | 0.0092   | -                | -                 |
|             | T G C     | 0.0162              | 0.0023   | -                | -                 |
|             | C A T     | 0.0098              | 0.0045   | -                | -                 |
|             | C A C     | NA                  | 0.023    | -                | -                 |
| 19-22-23    | G C A     | 0.4723              | 0.4982   | 1                | -                 |
|             | T T T     | 0.363               | 0.3104   | 0.82 (0.59-1.12) | 0.22              |
|             | T C T     | 0.0943              | 0.1063   | 1.12 (0.66-1.91) | 0.67              |
|             | T C A     | 0.0224              | 0.0398   | 1.73 (0.67-4.46) | 0.26              |
|             | G C T     | 0.0263              | 0.0299   | 1.10 (0.42-2.85) | 0.85              |
|             | G T T     | 0.0068              | 0.0126   | 1.60 (0.35-7.34) | 0.55              |
| 22-23-24    | C A T     | 0.4763              | 0.5178   | 1                | -                 |
|             | T T C     | 0.37                | 0.3184   | 0.81 (0.59-1.12) | 0.21              |
|             | C T C     | 0.1105              | 0.1293   | 1.13 (0.70-1.85) | 0.61              |
|             | C A C     | 0.0187              | 0.0201   | 1.36 (0.44-4.21) | 0.59              |
|             | C T T     | 0.0099              | 0.077    | -                | -                 |
|             | T A C     | 0.0072              | 0.0028   | -                | -                 |
